# Supplementary material
Source: PubMed Central journal article supplement (PMC6346391)
Supplement: oc8b00746_si_001.pdf [file oc8b00746_si_001.pdf]

*Supporting Information for:*

High-Performance Concurrent Chemo-immuno-  
radiotherapy for the Treatment of Hematologic  
Cancer through Selective High-Affinity Ligand  
(SHAL) Antibody Mimic-Functionalized  
Doxorubicin-Encapsulated Nanoparticles

*Kin Man Au,<sup>1,2</sup> Rod Balhorn,<sup>3</sup> Monique C. Balhorn,<sup>3</sup> Steven I. Park,<sup>4,5\*</sup> Andrew Z. Wang<sup>1,2\*</sup>*

<sup>1</sup> Laboratory of Nano- and Translational Medicine, Carolina Center for Cancer Nanotechnology Excellence, Carolina Institute of Nanomedicine, University of North Carolina at Chapel Hill, Chapel Hill, NC 27599, USA.

<sup>2</sup> Department of Radiation Oncology, Lineberger Comprehensive Cancer Center, University of North Carolina at Chapel Hill, Chapel Hill, NC 27599, USA.

<sup>3</sup> SHAL Technologies, Inc., 15986 Mines Road, Livermore, CA 94550, USA.

<sup>4</sup> Lineberger Comprehensive Cancer Center, University of North Carolina at Chapel Hill, Chapel Hill, NC 27599, USA.

<sup>5</sup> Levine Cancer Institute, Atrium Health, Division of Hematology and Oncology, 100 Medical Park Dr, Suite 110, Concord, NC 28025, USA.

\*Correspondence should be addressed to [steven.park@carolinashealthcare.org](mailto:steven.park@carolinashealthcare.org) (S.I.P.) or [zawang@med.unc.edu](mailto:zawang@med.unc.edu) (A.Z.W.).

## SUPPORTING FIGURES

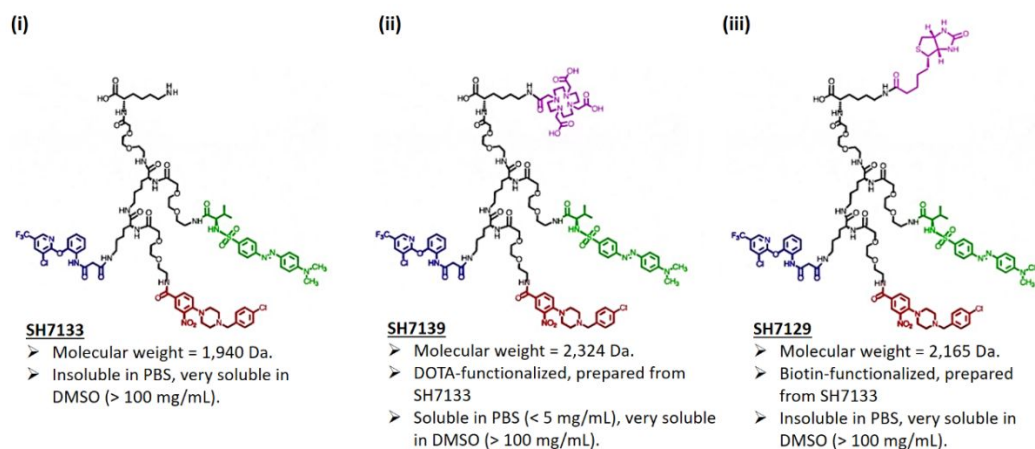

**Figure S1.** Chemical structures and water solubility of (i) SH7133 (primary amine-functionalized SHAL), (ii) SH7139 (DOTA-functionalized SHAL), and (iii) SH7129 (biotin-functionalized SHAL). SH7139 and SH7129 were prepared from SH7133. The synthesis, purification, and characterization of all SHALs were reported in references 21, 22, 29 and 58.

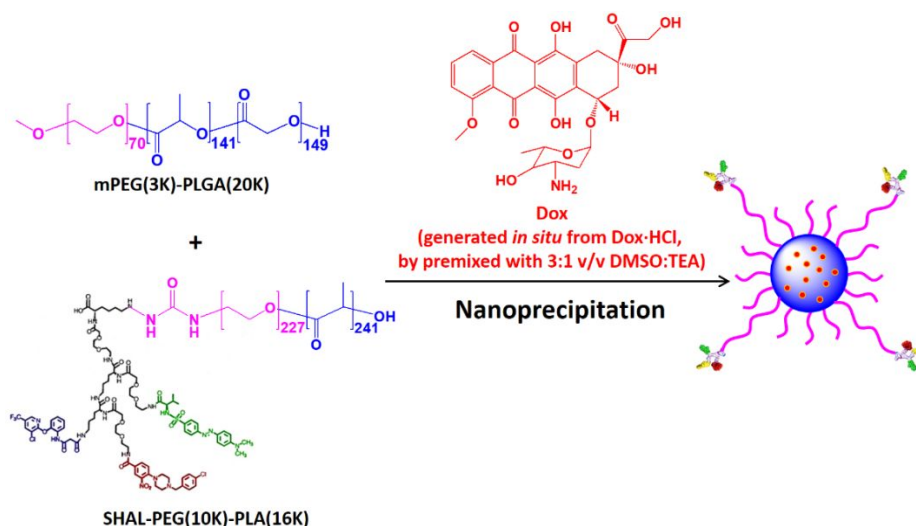

**Figure S2.** Synthesis of SHAL-functionalized Dox-encapsulated PEG-PLGA nanoparticles *via* nanoprecipitation. The building block of the PEG-PLGA NPs was PEG-PLGA. Hydrophilic Dox·HCl was converted to hydrophobic Dox *in situ* before the preparation of the NPs. The precipitation pH was about 9.0.

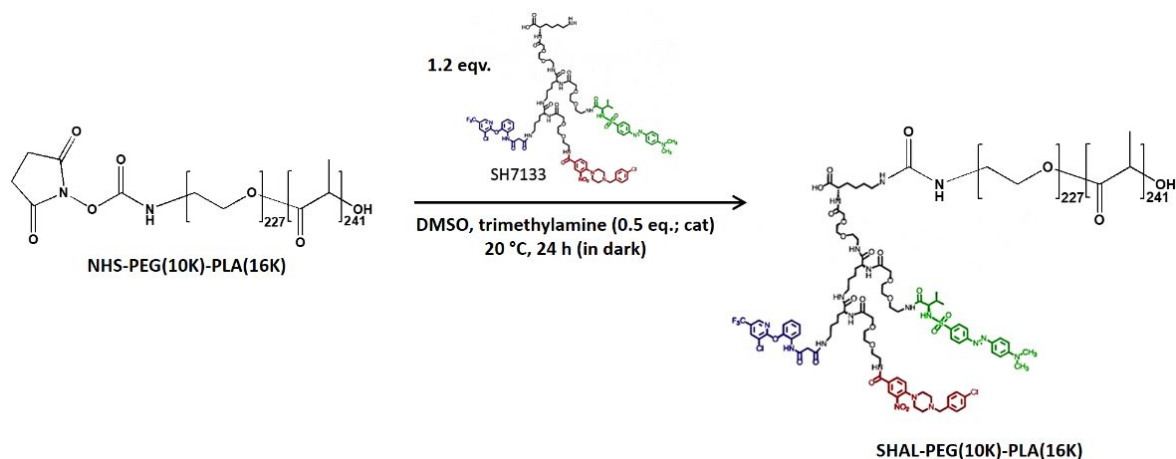

**Figure S3.** Synthesis of a SHAL-functionalized PEG-PLA diblock copolymer from amine-functionalized SHAL (SH7133) and a PLA(16K)-PEG(10K)-NHS ester.

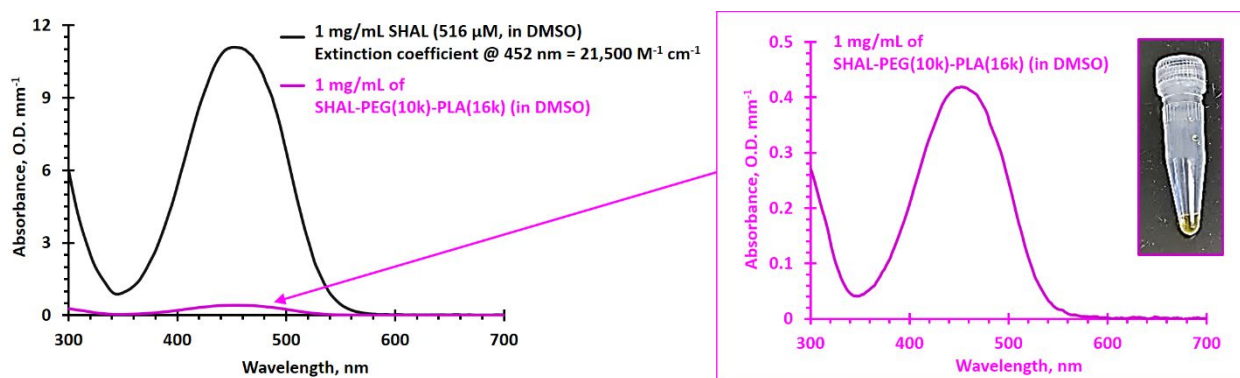

**Figure S4.** Ultraviolet-visible spectra of amine-functionalized SHAL (SH7133, 1 mg/mL in DMSO, 516 μM) and purified SHAL-functionalized PEG-PLA (1 mg/mL in DMSO). The extinction coefficient of SH7133 at 454 nm was 21,500 M<sup>-1</sup> cm<sup>-1</sup>. It was calculated that 52.7 mol% of the PEG-PLA was functionalized with SH7133 (conjugation efficiency ≈ 59%, since 90% of the PEG-PLA was functionalized with the NHS ester). The inset shows a digital image of the SHAL-functionalized PEG-PLA (1 mg/mL in DMSO).

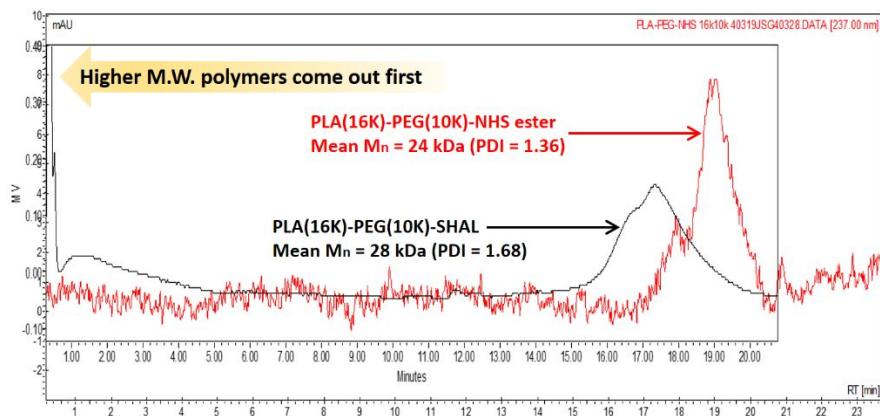

**Figure S5.** Tetrahydrofuran (THF) gel permeation chromatography (GPC) traces of the PLA(16K)-PEG(10K)-NHS ester and purified PLA(16K)-PEG(10K)-SHAL. The molecular weights of both polymers were calculated using Agilent PS2 polystyrene standards.

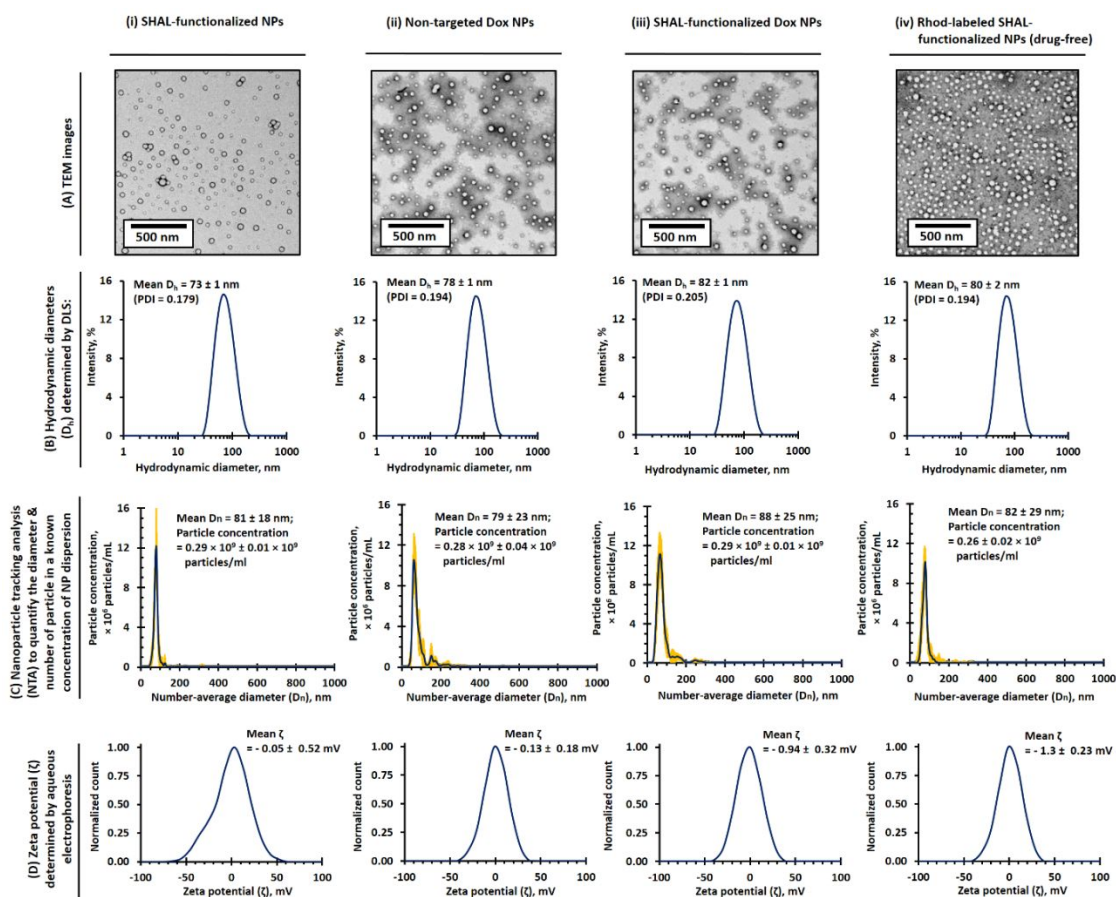

**Figure S6.** Characterization of (i) drug-free SHAL-functionalized NPs, (ii) non-targeted Dox-encapsulated PEG-PLGA NPs, (iii) SHAL-functionalized Dox-encapsulated NPs, and (iv) SHAL-functionalized Rhod-labeled PEG-PLGA NPs. (A) TEM images of non-targeted and SHAL-functionalized PEG-PLGA NPs. The number-average diameters of the PEG-PLGA NPs were 50–60 nm. (B) The plot of intensity-average diameters (also known as hydrodynamic diameters ( $D_h$ )) and their polydispersities (PDIs) of different PEG-PLGA NPs, as determined using the dynamic light scattering method. The mean  $D_h$  of most PEG-PLGA NPs were 70–85 nm, and the PDI was about 0.20. (C) The number-average diameter of different PEG-PLGA NPs as determined by the nanoparticle tracking analysis (NTA) method on NP dispersions. The mean  $D_n$  of different PEG-PLGA NPs was about 80 nm. (D) The plot of the zeta potentials ( $\zeta$ ) of different PEG-PLGA NPs dispersed in 0.1 M PBS determined by an aqueous electrophoresis method.

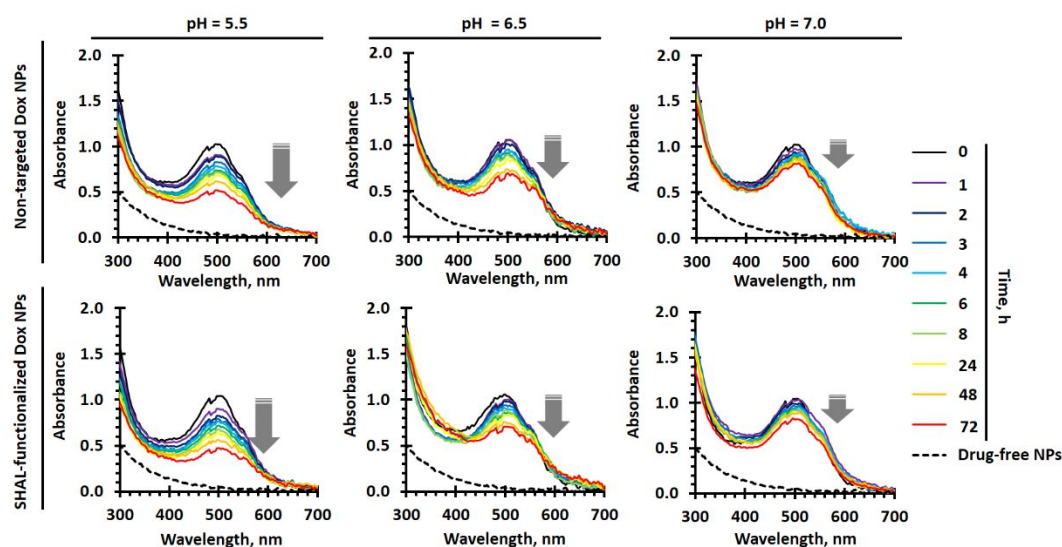

**Figure S7.** Drug release kinetics at neutral (pH 7.0) and different mild acidic (either 6.5 or pH 5.5) conditions. Averaged time-dependent ultraviolet-visible spectra of (i) non-targeted Dox NPs and (ii) SHAL-functionalized Dox NPs after incubation in a large excess of 1X PBS at pH 5.5, 6.5 or 7.0 at 37 °C. The concentrations of both NPs were 2 mg/mL. The drug-encapsulation efficiencies of the non-targeted Dox NPs and SHAL-functionalized Dox NPs were  $56.7 \pm 1.0\%$  (i.e., 1 mg NPs contains 28.4  $\mu\text{g}$  encapsulated Dox) and  $57.8 \pm 1.1\%$  (i.e., 1 mg NPs contains 28.9  $\mu\text{g}$  encapsulated Dox), respectively. (n = 3):

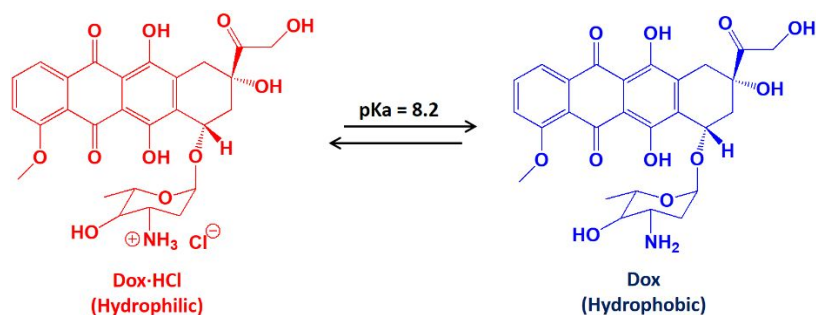

**Figure S8.** Chemical structures and solubility of doxorubicin (Dox) at different pHs. The Figure was adapted with modification from reference 34.



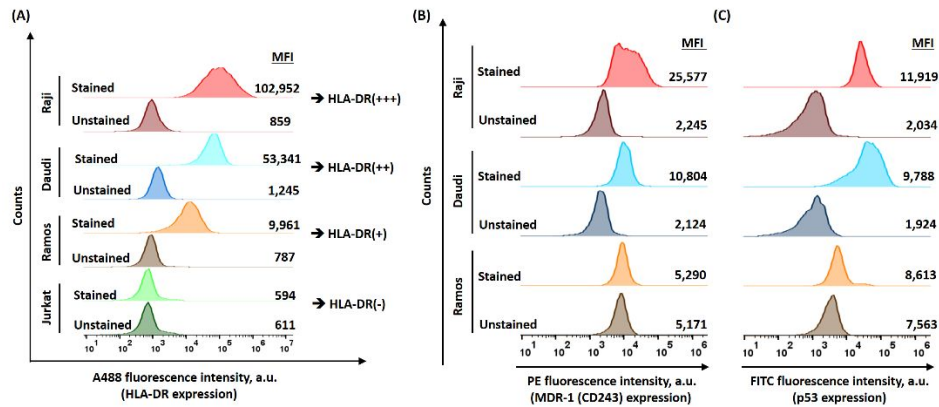

**Figure S9.** (A) HLA-DR expressions of 4 well-established lymphoma cell lines. (B and C) MDR-1 and p53 expressions of 3 different HLA-DR-expressed Ramos, Daudi and Raji cells. The amounts of HLA-DR, MDR-1, and intracellular p53 expressions were quantified by FACS method after staining the cells with an A488-labeled anti-human HLA-DR antibody (BioLegend, Clone L243), PE-labeled anti-human CD243 antibody (BioLegend, Clone: 4E3.16) and FITC-labeled anti-human p53 antibody (BioLegend, Clone DO-7), respectively.

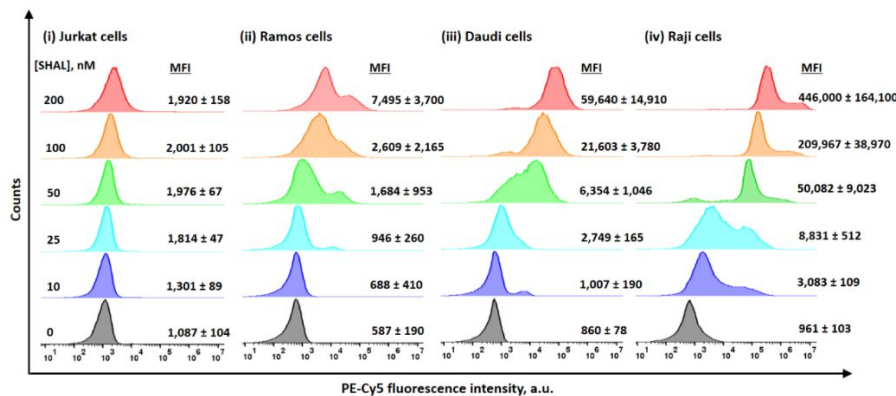

**Figure S10.** Binding affinities of biotin-functionalized SHAL (SH7129) in different lymphoma cell lines with different HLA-DR antigen expressions. Representative FACS histograms of (i) Jurkat, (ii) Ramos, (iii) Daudi, and (iv) Raji cells after staining with different concentrations (0–200 nM) of biotin-functionalized SHAL and detecting the bound SHAL using streptavidin-PE-Cy5. The cells were pre-blocked with a biotin-streptavidin blocking agent before the binding study to prevent non-specific binding. (n = 3)

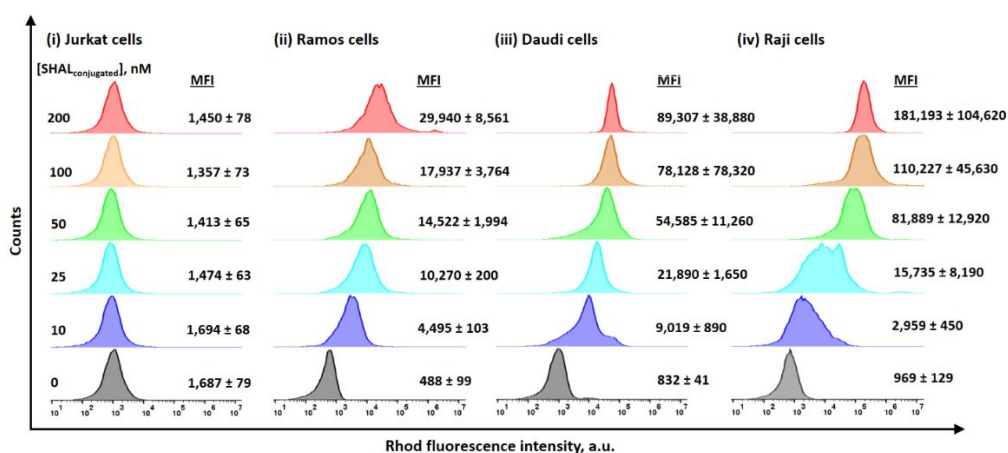

**Figure S11.** Binding affinities of SHAL-functionalized Rhod-labeled NPs in different lymphoma cell lines with different HLA-DR antigen expressions. Representative FACS histograms of (i) Jurkat, (ii) Ramos, (iii) Daudi, and (iv) Raji cells after staining with different concentrations of Rhod-labeled SHAL-functionalized NPs (contained 0–200 nM of conjugated SHAL). (n = 3)

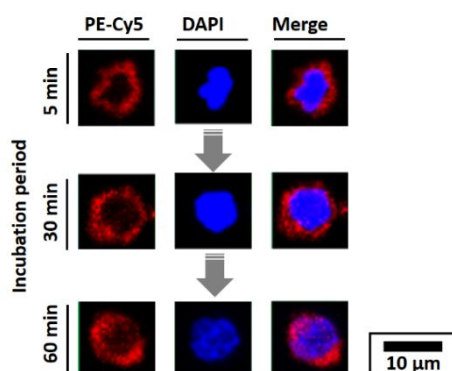

**Figure S12.** Time-dependent CLSM images of Raji cells after staining with biotin-functionalized SHAL (SH7129) (with attached PE-Cy5-functionalized streptavidin to enable visualization of the complex) and subsequent incubation at physiological conditions for 5–60 min. Red is PE-Cy5 staining of SH7129 bound to PE-Cy5-streptavidin. Blue is DAPI staining of the nucleus.



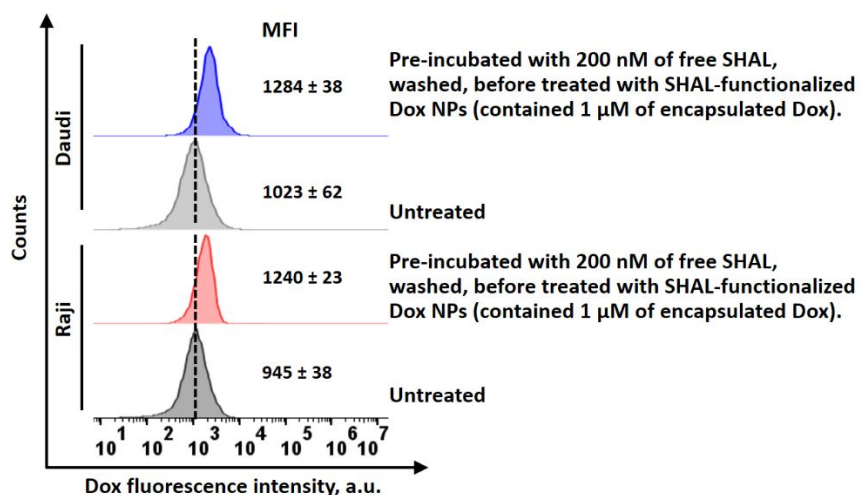

**Figure S13.** *In vitro* uptake of SHAL-functionalized Dox NPs (contained 1  $\mu$ M of encapsulated Dox) by free-SHAL (hydrophilic DOTA-functionalized SHAL, SH7139)-pretreated Daudi and Raji cells, as quantified by FACS method.

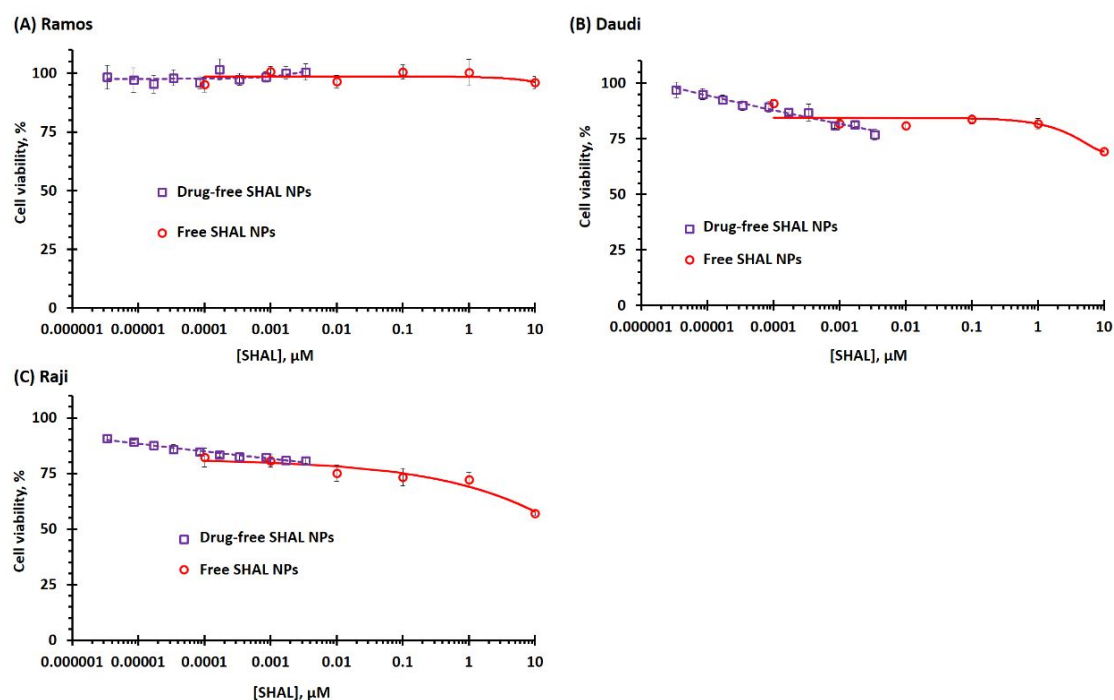

**Figure S14.** *In vitro* toxicities of free SHAL (DOTA-functionalized SHAL, SH7139) and drug-free SHAL-functionalized NPs in (A) Ramos, (B) Daudi, and (C) Raji cells. The cell viabilities were quantified after treatment using an MTS assay. The toxicities of free SHAL and SHAL-functionalized NPs in all three cell lines were well above 10  $\mu$ M. (n = 8 per group).

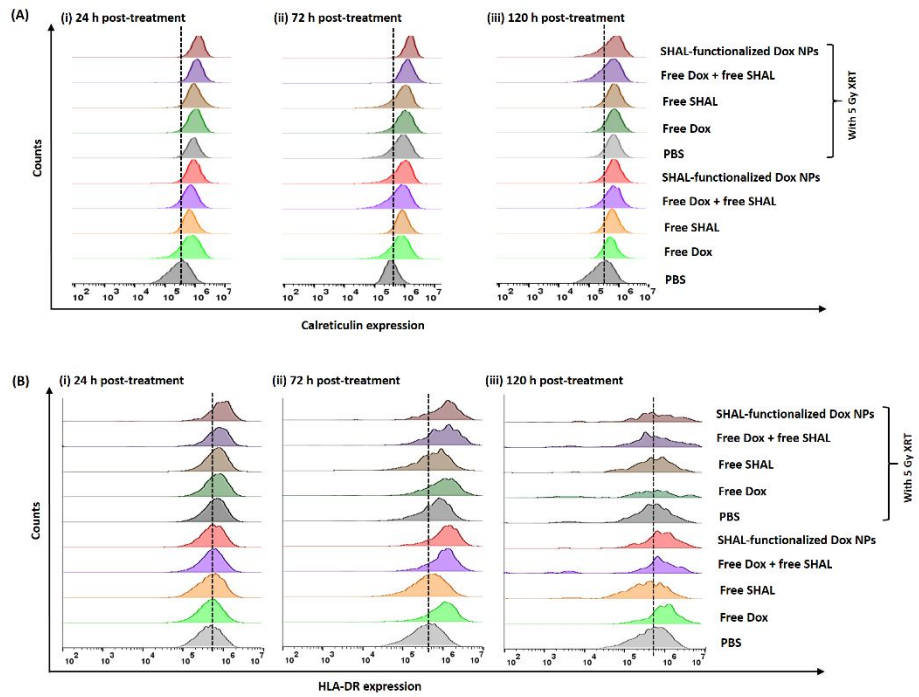

**Figure S15.** (A) Representative flow histograms of A488-labeled anti-calreticulin-stained Raji cells at 1, 3, and 5 days after treatment with  $IC_{25}$  of Dox (either free or encapsulated Dox), with or without 5 Gy X-ray irradiation (which occurs 24 h after the initial drug treatment). (B) Representative flow histograms of A488-labeled anti-HLA-DR-stained Raji cells at 1, 3, and 5 days after treatment with  $IC_{25}$  of Dox (either free or encapsulated Dox), with or without 5 Gy X-ray irradiation (which occurs 24 h after the initial drug treatment).

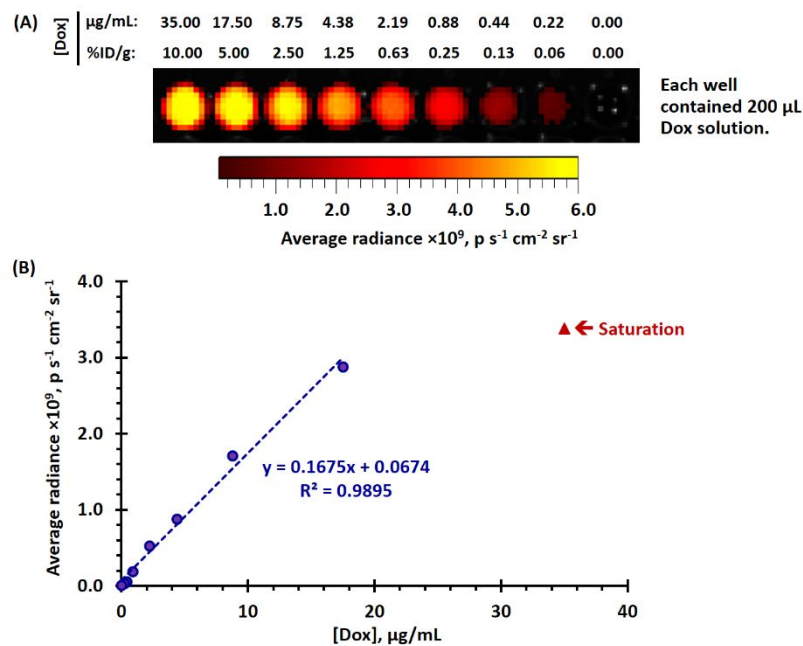

**Figure S16.** Quantification of Dox *via* the IVIS Kinetic imaging system. (A) Fluorescence image of different concentrations of Dox (dissolved in 1X PBS). The image was recorded *via* an IVIS Kinetic imaging system. The *ex vivo* fluorescence image was recorded using a DsRed emission filter ( $\lambda_{\text{em}} = 575\text{--}650 \text{ nm}$ ) upon excitation at  $465 \pm 15 \text{ nm}$ . (B) The plot of the average radiances of different concentrations of Dox solutions. The average radiances increase linearly with Dox concentrations up to  $17.5 \mu\text{g/mL}$ .

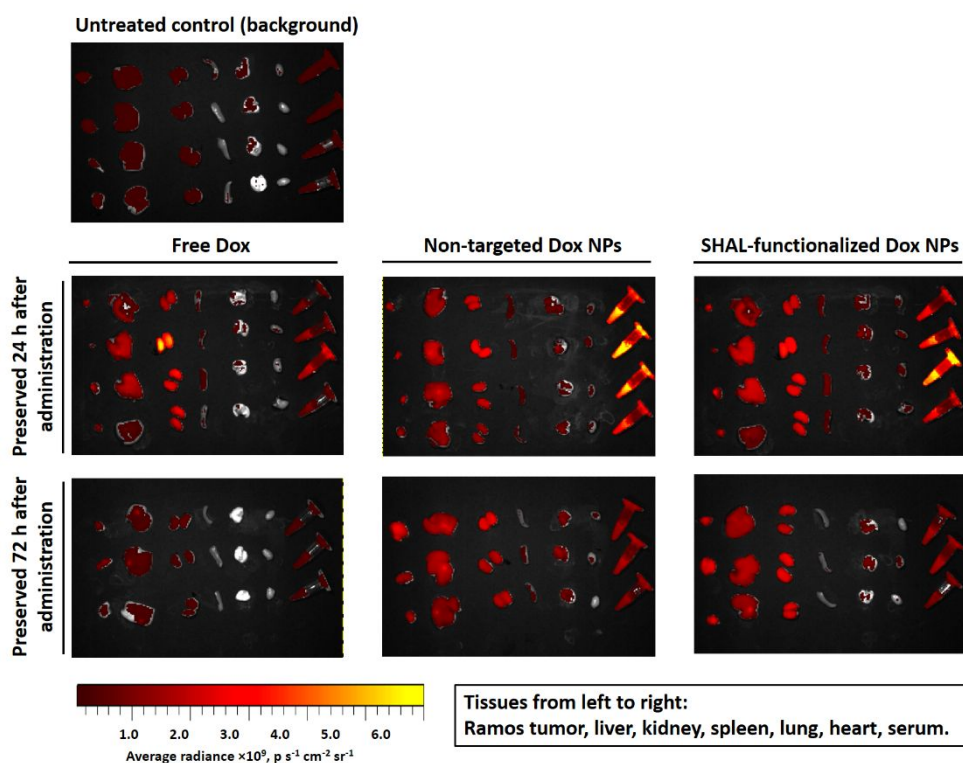

**Figure S17.** Biodistribution of free or encapsulated Dox in Ramos xenograft tumor-bearing mice. *Ex vivo* fluorescence images of Ramos xenograft tumors, key organs (liver, kidney, spleen, lung, and heart), and serum harvested from Ramos xenograft tumor-bearing mice 24 or 72 h after tail vein i.v. injection of 3.5 mg/kg of free or encapsulated Dox. The Ramos xenograft tumor, liver, kidney, spleen, lung, heart, and serum were preserved from non-treated mice as a control. The *ex vivo* fluorescence images were recorded through a DsRed emission filter ( $\lambda_{em} = 575\text{--}650$  nm) upon excitation at  $465 \pm 15$  nm ( $n = 4$  per group for all experimental and control groups, except  $n = 3$  for the treatment groups preserved 72 h after the i.v. injection).

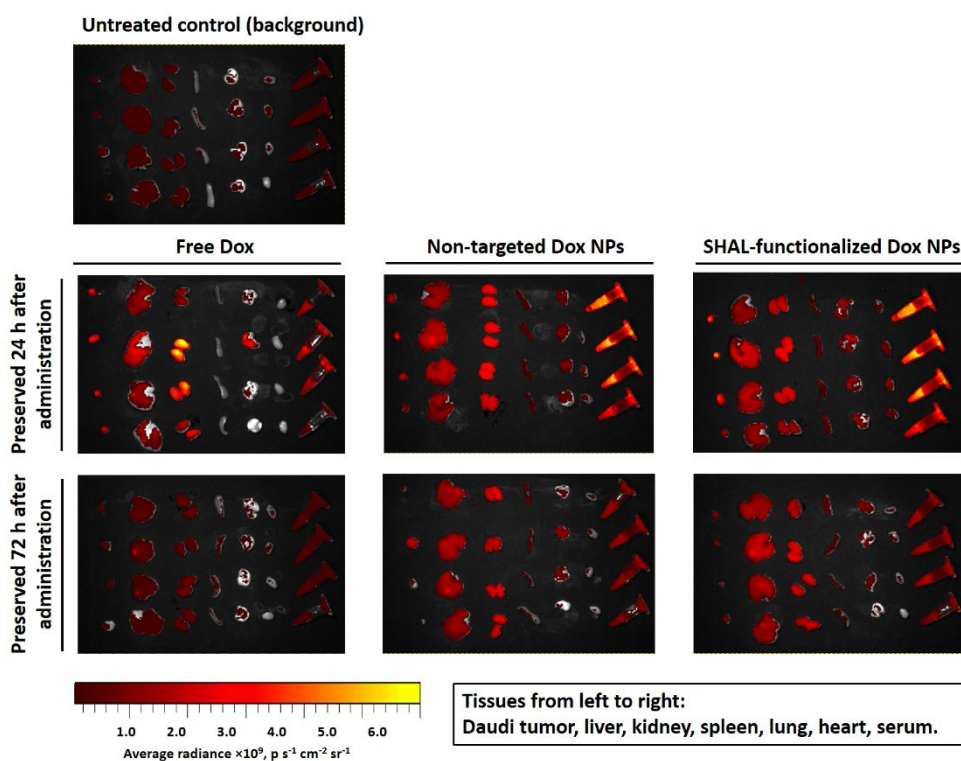

**Figure S18.** Biodistribution of free or encapsulated Dox in Daudi xenograft tumor-bearing mice. *Ex vivo* fluorescence images of Daudi xenograft tumor, key organs (liver, kidney, spleen, lung, and heart), and serum harvested from Daudi xenograft tumor-bearing mice 24 or 72 h after tail vein i.v. injection of 3.5 mg/kg of free or encapsulated Dox. The Daudi xenograft tumor, liver, kidney, spleen, lung, heart, and serum were preserved from non-treated mice as a control. The *ex vivo* fluorescence images were recorded through a DsRed emission filter ( $\lambda_{\text{em}} = 575\text{--}650$  nm) upon excitation at  $465 \pm 15$  nm. ( $n = 4$  per group)

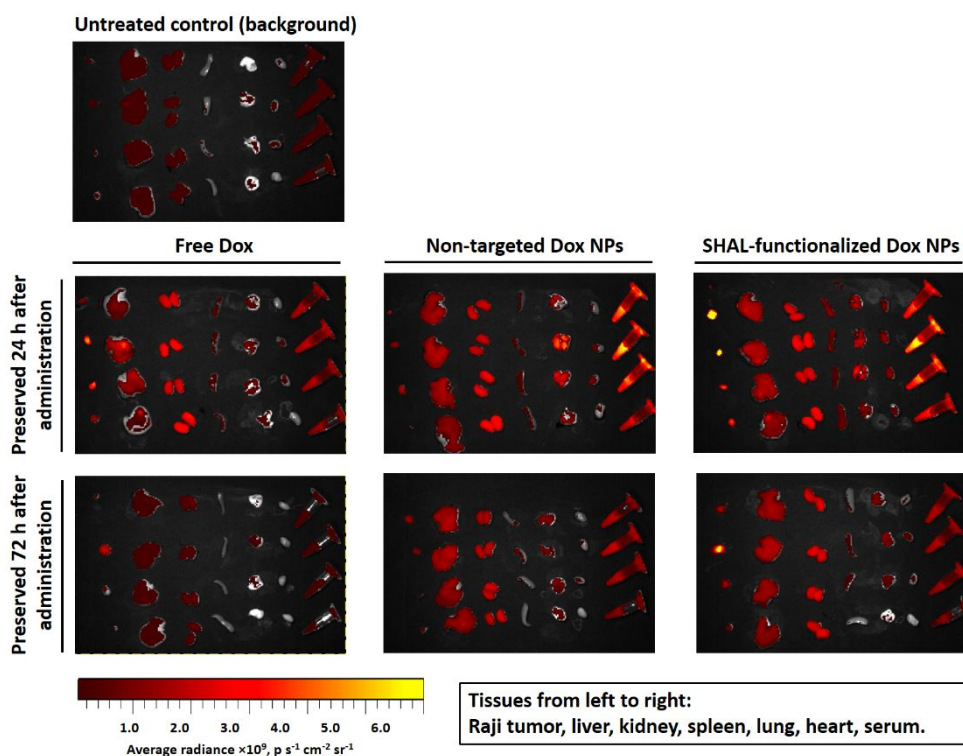

**Figure S19.** Biodistribution of free or encapsulated Dox in Raji xenograft tumor-bearing mice. *Ex vivo* fluorescence images of the Raji xenograft tumor, key organs (liver, kidney, spleen, lung, and heart), and serum harvested from Raji xenograft tumor-bearing mice 24 or 72 h after the tail vein i.v. injection of 3.5 mg/kg of free or encapsulated Dox. The Raji xenograft tumor, liver, kidney, spleen, lung, heart, and serum were preserved from non-treated mice as a control. The *ex vivo* fluorescence images were recorded using a DsRed emission filter ( $\lambda_{em} = 575\text{--}650$  nm) upon excitation at  $465 \pm 15$  nm. (n = 4 per group)



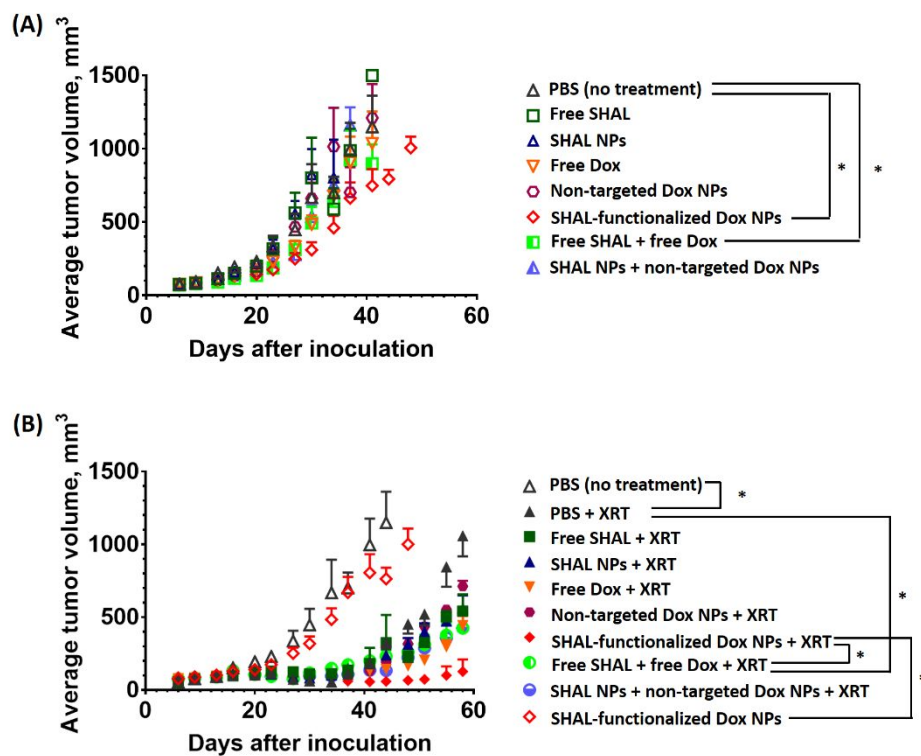

**Figure S20.** *In vivo* anticancer activities of Dox and Dox nanoformulations for chemo-immunotherapy and concurrent CIRT in the Daudi xenograft tumor model. (A) Averaged tumor growth curves of mice in the non-treatment control group and in different treatment groups that received treatment with small molecule Dox or different Dox nanoformulations. (B) Averaged tumor growth curves of mice in the non-treatment control group and different treatment groups that received treatment with small molecule Dox or different Dox nanoformulations. Mice in the concurrent CIRT groups received 5 Gy XRT 24 h after each i.v. administration of therapeutics. (n = 7 or 8; \* denotes  $p < 0.05$ , i.e., statistically significant; n.s. denotes  $p > 0.05$ , i.e., statistically insignificant).

**Chemo-immunotherapy groups**

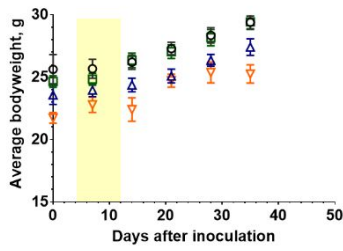

- PBS
- Free SHAL
- △ SHAL NPs
- ▽ Free Dox

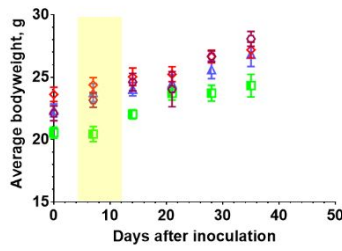

- Non-targeted Dox NPs
- ◇ SHAL-functionalized Dox NPs
- Free SHAL + free Dox
- △ Non-targeted Dox NPs + SHAL NPs

**Concurrent CIRT groups**

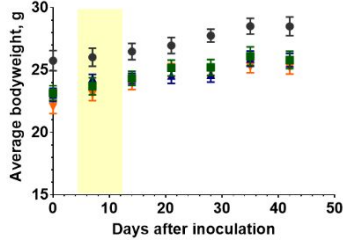

- PBS + XRT
- Free SHAL + XRT
- ▲ SHAL NPs + XRT
- ▼ Free Dox + XRT

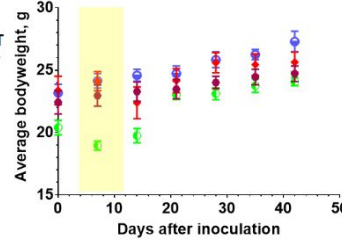

- Non-targeted Dox NPs + XRT
- ◆ SHAL-functionalized Dox NPs + XRT
- Free SHAL + free Dox + XRT
- Non-targeted Dox NPs + SHAL NPs + XRT

**Figure S21.** The average body weight of Daudi xenograft tumor-bearing mice after receiving different treatments. The yellow highlighted regions show the treatment period. (n = 7 or 8)

**Chemo-immunotherapy groups**

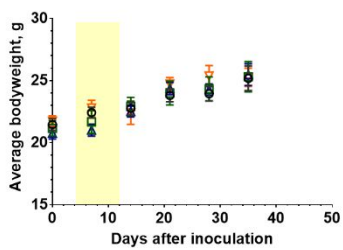

- PBS
- Free SHAL
- △ SHAL NPs
- ▽ Free Dox

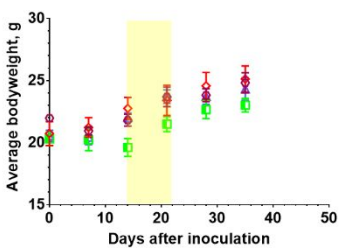

- Non-targeted Dox NPs
- ◇ SHAL-functionalized Dox NPs
- Free SHAL + free Dox
- △ Non-targeted Dox NPs + SHAL NPs

**Concurrent CIRT groups**

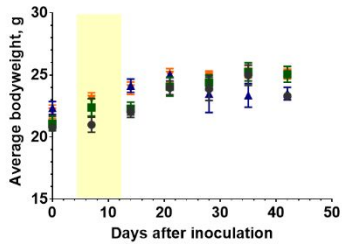

- PBS + XRT
- Free SHAL + XRT
- ▲ SHAL NPs + XRT
- ▼ Free Dox + XRT

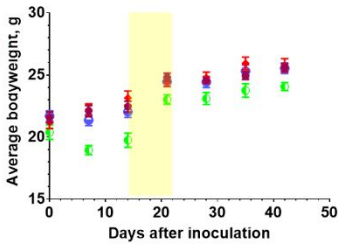

- Non-targeted Dox NPs + XRT
- ◆ SHAL-functionalized Dox NPs + XRT
- Free SHAL + free Dox + XRT
- Non-targeted Dox NPs + SHAL NPs + XRT

**Figure S22.** Average body weight of Raji xenograft tumor-bearing mice after receiving different treatments. Mice in the concurrent CIRT groups were given 5 Gy XRT 24 h after each i.v. administration of therapeutics. The yellow highlighted regions indicate the treatment period. (n = 6 or 7)

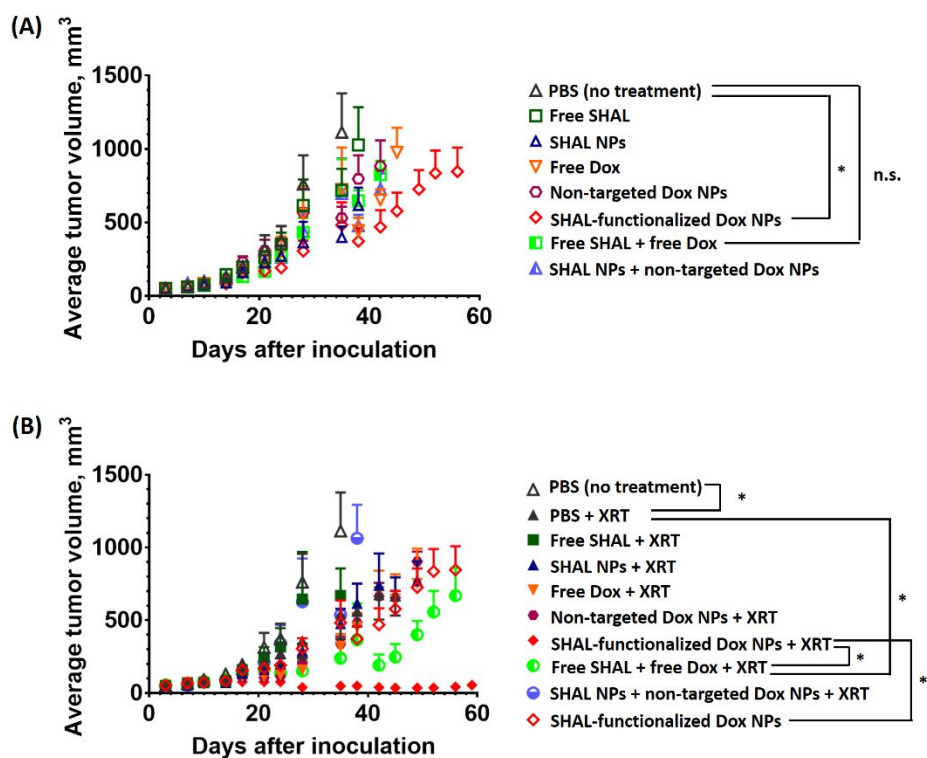

**Figure S23.** *In vivo* anticancer activities of Dox and Dox nanoformulations for chemo-immunotherapy and concurrent CIRT in the Raji xenograft tumor model. (A) The averaged tumor growth curves of mice in the non-treatment control group and different treatment groups receiving treatment with small molecule Dox or Dox nanoformulations. (B) Averaged tumor growth curves of mice in the non-treatment control group and in different treatment groups that received treatment with small molecule Dox or Dox nanoformulations. Mice in the concurrent CIRT groups received 5 Gy XRT 24 h after each i.v. administration of therapeutics (n = 6 or 7; \* denotes  $p < 0.05$ , i.e., statistically significant; n.s. denotes  $p > 0.05$ , i.e., statistically insignificant).

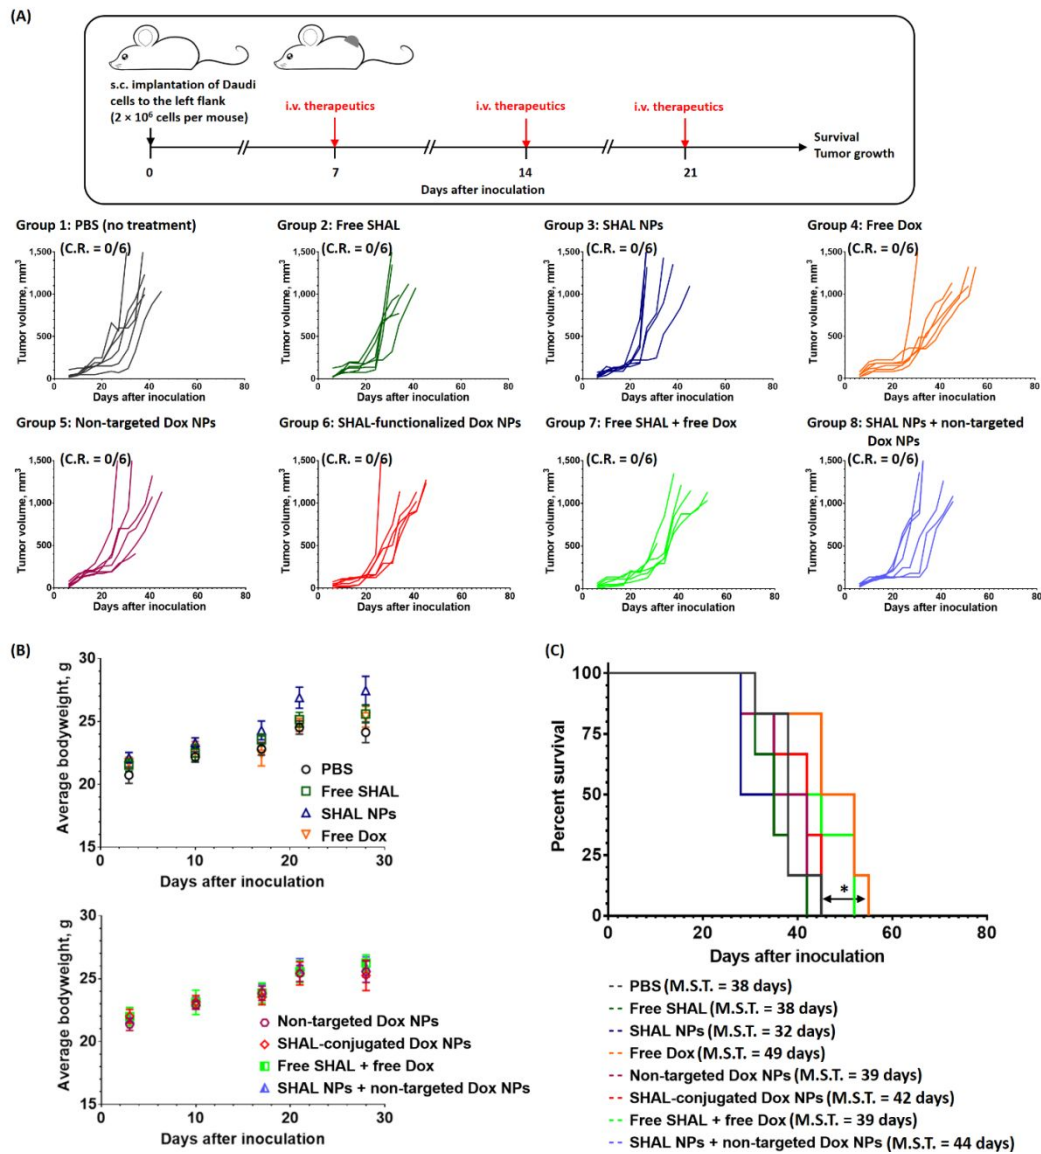

**Figure S24.** *In vivo* anticancer activities of free Dox and different Dox nanoformulations for chemo-immunotherapy in the Daudi xenograft tumor model with a less intense treatment schedule (i.e., a one week rest period between treatments). (A) The treatment schedule and tumor growth curve of individual mice in the control and treatment groups. Treatment doses were  $3 \times 3.5$  mg/kg of free/encapsulated Dox and/or  $3 \times 5$   $\mu$ g/kg of free/conjugated SHAL. (B) The average bodyweight of mice in different control and treatment groups recorded after tumor inoculation. (C) Kaplan-Meier survival curves of mice in the non-treatment group and chemo-immunotherapy groups ( $n = 6$  per group; \* denotes  $p < 0.05$ , i.e., statistically significant).



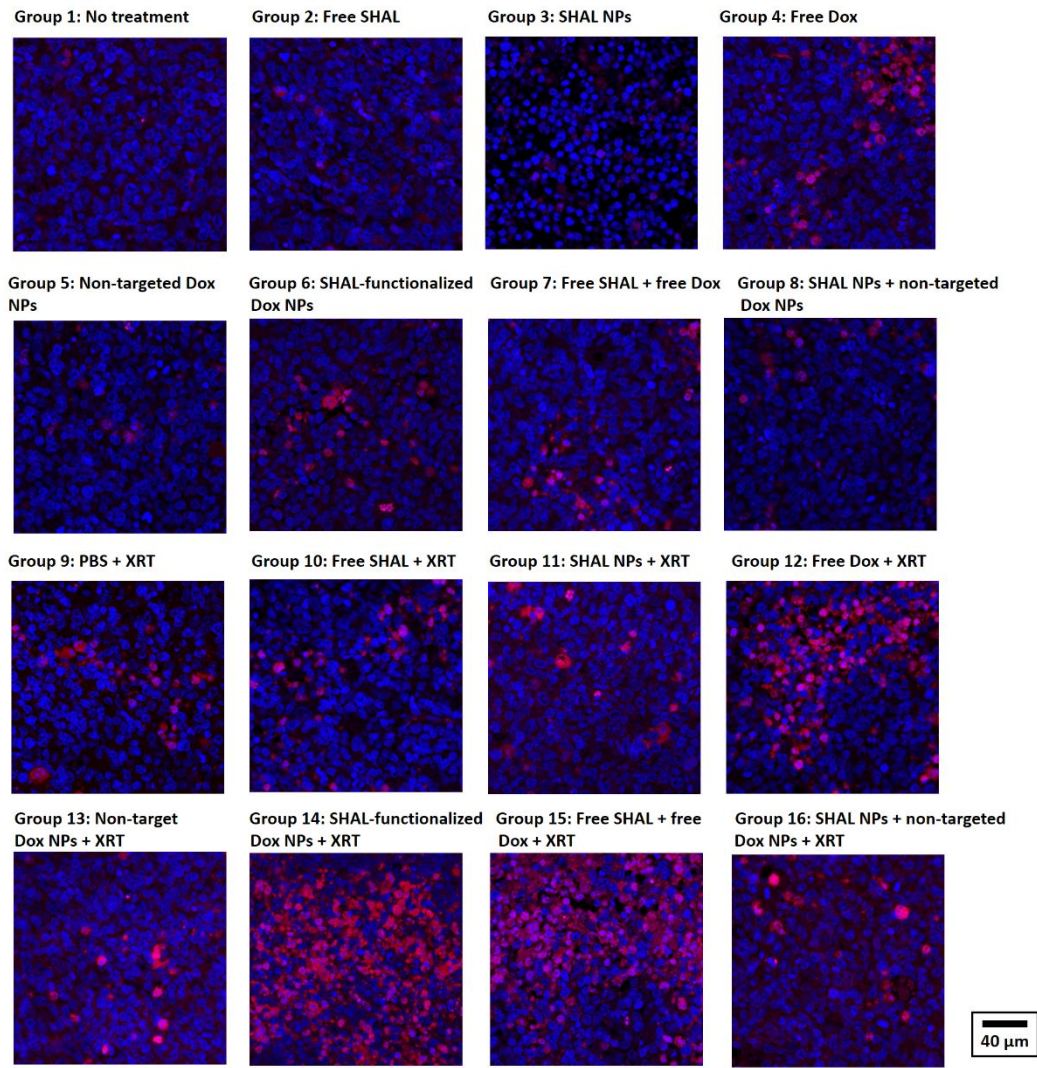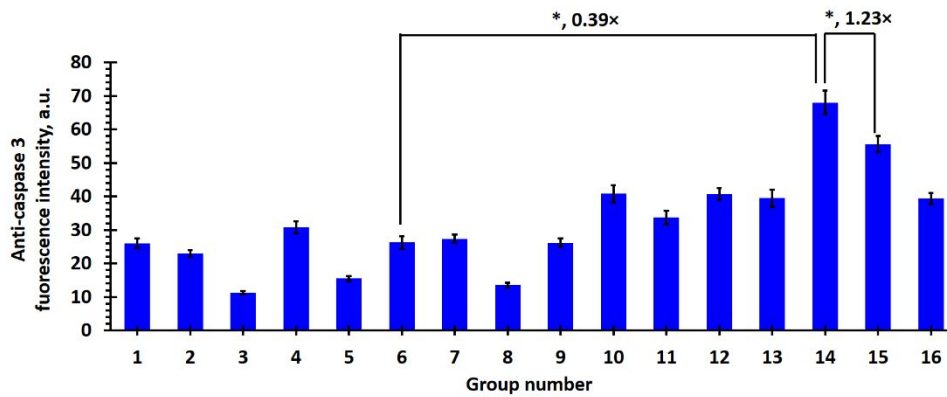

**Figure S25.** Representative CLSM images of anti-caspase 3-stained Raji tumor sections preserved 3 days after different treatments. All nuclei were stained with DAPI (blue fluorescence). The strong red fluorescence were caspase 3-positive cells. [n = 3 per group; \* denotes  $p < 0.05$ , i.e., statistically significant.]

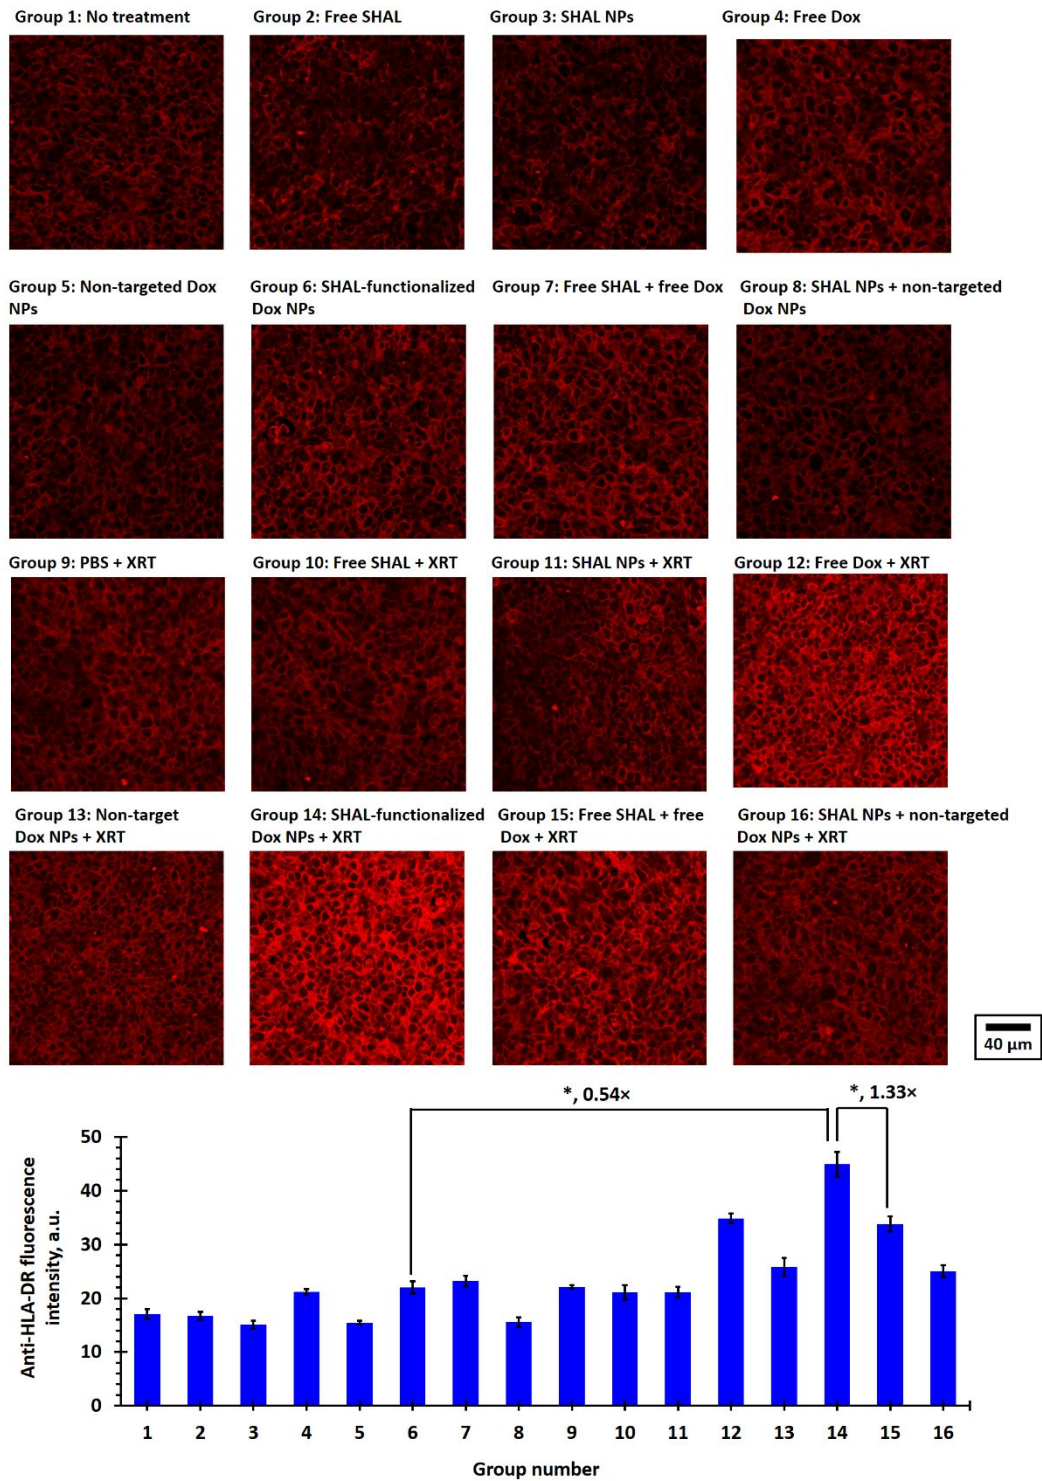

**Figure S26.** Representative CLSM images of anti-HLA-DR-stained Raji tumor sections preserved 3 days after different treatments. The fluorescence intensity proportional to the HLA-DR expression of the treated cancer cells. [n = 3 per group; \* denotes  $p < 0.05$ , i.e., statistically significant.]



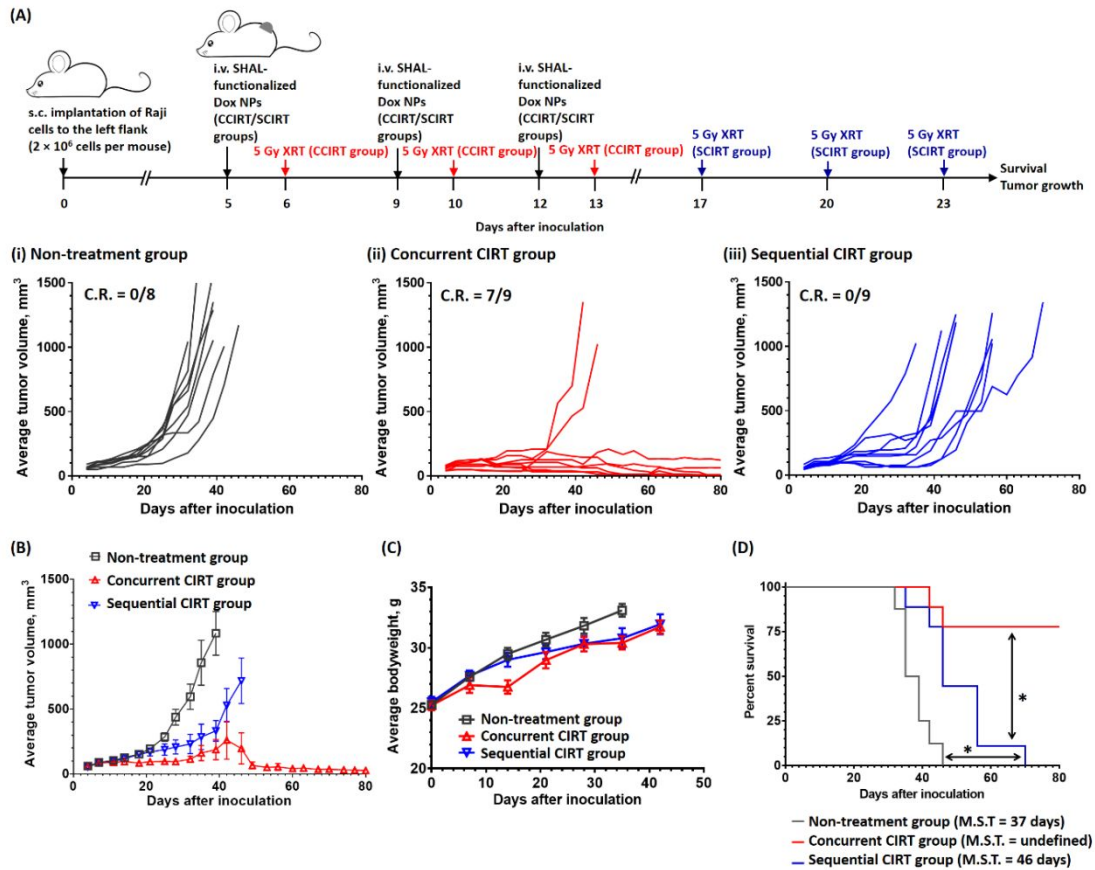

**Figure S27.** *In vivo* anticancer activities of SHAL-functionalized Dox NPs in a Raji xenograft tumor model administrated using different treatment schedules. (A) The treatment schedule and tumor growth curve of individual mice in the control and treatment groups. Treatment doses were  $3 \times 3.5$  mg/kg of encapsulated Dox plus  $3 \times 5$   $\mu$ g/kg of conjugated SHAL. (B) Average tumor growth curves of mice in the non-treatment, concurrent CIRT and sequential CIRT groups. (C) The average bodyweight of mice in different control and treatment groups recorded after tumor inoculation. (D) Kaplan-Meier survival curves of mice in the non-treatment group and chemo-immunotherapy groups ( $n = 6$  per group; \* denotes  $p < 0.05$ , i.e., statistically significant).

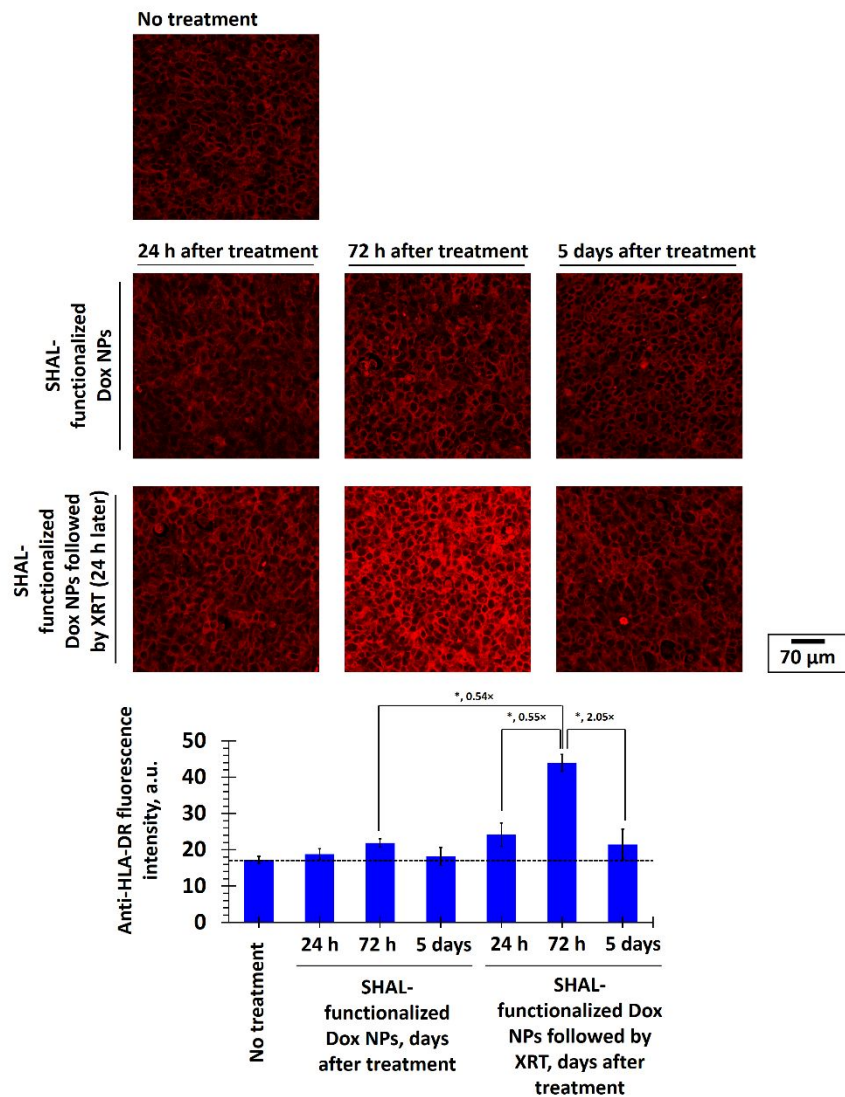

**Figure S28.** Representative CLSM images of anti-HLA-DR-stained Raji tumor sections preserved 24 h, 72 h and 5 days after the treatment with SHAL-functionalized Dox NPs (with and without 5 Gy XRT 24 h after the administration of SHAL-functionalized Dox NPs). The fluorescence intensity proportional to the HLA-DR expression of the treated cancer cells. [n = 3 per group; \* denotes  $p < 0.05$ , i.e., statistically significant.]

## SUPPORTING TABLES

|              | Reference range | PBS (control) | Free SHAL     | Drug-free SHAL NPs | Free Dox      | Non-targeted Dox NPs | SHAL-functionalized Dox NPs | Drug-free SHAL NPs + non-targeted Dox NPs | Free SHAL + free Dox | Drug-free mPEG-PLGA NPs |
|--------------|-----------------|---------------|---------------|--------------------|---------------|----------------------|-----------------------------|-------------------------------------------|----------------------|-------------------------|
| RBC, M/uL    | 8.9 ± 1.4       | 9.5 ± 0.5     | 9.1 ± 0.3     | 9.6 ± 0.2          | 9.3 ± 0.3     | 8.9 ± 0.3            | 8.9 ± 0.2                   | 9.2 ± 0.1                                 | 9.3 ± 0.1            | 9.5 ± 0.3               |
| HGB, g/dL    | 14.7 ± 2.2      | 15.8 ± 0.8    | 14.8 ± 0.4    | 15.6 ± 0.4         | 15.3 ± 0.3    | 14.7 ± 0.2           | 15.1 ± 0.5                  | 14.9 ± 0.2                                | 15.0 ± 0.2           | 15.4 ± 0.3              |
| MCHC, g/dL   | 29.5 ± 2.8      | 30.7 ± 0.4    | 31.3 ± 0.2    | 30.5 ± 0.2         | 30.7 ± 0.1    | 31.2 ± 0.3           | 31.1 ± 0.1                  | 31.8 ± 0.5                                | 31.2 ± 0.3           | 30.7 ± 0.2              |
| RET#, K/uL   | 338.3 ± 140.5   | 478.9 ± 68.4  | 394.4 ± 17.0  | 318.1 ± 46.6       | 39.7 ± 6.7 *  | 261.5 ± 75.3         | 254.2 ± 56.4                | 258.6 ± 32.4                              | 52.4 ± 22.9 *        | 369.7 ± 48.8            |
| PLT, K/uL    | 1538.9 ± 4006   | 805.8 ± 23.1  | 587.75 ± 82.1 | 656.4 ± 121.7      | 729.5 ± 169.7 | 728.2 ± 38.2         | 953.0 ± 75.4                | 780.8 ± 52.5                              | 806.0 ± 28.7         | 799.4 ± 20.0            |
| WBC, K/uL    | 3.8 ± 0.8       | 5.8 ± 1.3     | 6.4 ± 1.0     | 4.8 ± 0.8          | 5.2 ± 1.0     | 5.2 ± 0.4            | 5.0 ± 1.3                   | 4.0 ± 0.6                                 | 5.7 ± 0.9            | 5.3 ± 0.4               |
| NEUT#, K/uL  | 0.90 ± 0.40     | 0.82 ± 0.13   | 0.67 ± 0.15   | 0.50 ± 0.08        | 0.44 ± 0.05   | 0.64 ± 0.16          | 0.55 ± 0.04                 | 0.46 ± 0.07                               | 0.41 ± 0.05          | 0.66 ± 0.15             |
| LYMPH#, K/uL | 6.7 ± 2.2       | 7.1 ± 1.2     | 8.1 ± 0.9     | 6.2 ± 0.8          | 3.2 ± 0.7 *   | 6.3 ± 0.4            | 7.2 ± 1.1                   | 6.5 ± 0.5                                 | 3.5 ± 0.4 *          | 6.8 ± 0.3               |
| MONO#, K/uL  | 0.10 ± 0.0      | 0.16 ± 0.03   | 0.28 ± 0.11   | 0.16 ± 0.01        | 0.48 ± 0.14   | 0.37 ± 0.08          | 0.22 ± 0.06                 | 0.21 ± 0.2                                | 0.19 ± 0.01          | 0.19 ± 0.05             |
| EO#, K/uL    | 0.20 ± 0.20     | 0.08 ± 0.02   | 0.09 ± 0.02   | 0.11 ± 0.03        | 0.12 ± 0.02   | 0.09 ± 0.01          | 0.06 ± 0.01                 | 0.07 ± 0.01                               | 0.10 ± 0.02          | 0.08 ± 0.02             |
| BASO#, K/uL  | 0.040 ± 0.050   | 0.006 ± 0.002 | 0.008 ± 0.002 | 0.015 ± 0.008      | 0.014 ± 0.006 | 0.006 ± 0.002        | 0.004 ± 0.002               | 0.006 ± 0.002                             | 0.008 ± 0.002        | 0.010 ± 0.003           |

**Table S1.** Hematological toxicities of free SHAL SH7129, conjugated SHAL, free Dox, and different Dox nanoformulations in healthy CD1 mice (female, 10 weeks old). The drug doses were: 10 mg/kg of Dox (either free or encapsulated Dox), 15 µg/kg of free or conjugated Dox, 15 µg/kg SH7129 or conjugated SHAL. Full blood was preserved 48 h after i.v. administration of different formulations for hematological study. (N.B., RBC = red blood cell count; HGB = hemoglobin count; MCV = mean corpuscular volume; MCH = hemoglobin amount per red blood cell; MCHC = mean corpuscular hemoglobin concentration; RET = reticulocytes count; PLT = platelet count; PDW = platelet distribution width; MPV = mean platelet volume; WBC = white blood cell count; NEUT = neutrophils count; LYMPH = lymphocytes count; MONO = mononucleosis count; EO = eosinophilia count; BASO = basophils count. n = 5 per group. \* denotes abnormal.)

|                                          | Time in days<br>required for<br>tumor to grow to<br>1,000 cm <sup>3</sup> or<br>death | Absolute<br>growth<br>delay<br>(A.G.D.),<br>day(s) <sup>a</sup> | Normalized<br>growth delay<br>(N.G.D.),<br>days <sup>b</sup> | Enhancement<br>factors (E.F.)<br>(change in tumor<br>sensitivity to<br>XRT, %) <sup>c</sup> |
|------------------------------------------|---------------------------------------------------------------------------------------|-----------------------------------------------------------------|--------------------------------------------------------------|---------------------------------------------------------------------------------------------|
| PBS (no treatment)                       | 38.7 ± 2.1                                                                            |                                                                 |                                                              |                                                                                             |
| Free SHAL                                | 35.3 ± 2.3                                                                            | N/A                                                             |                                                              |                                                                                             |
| SHAL NPs                                 | 35.3 ± 2.6                                                                            | N/A                                                             |                                                              |                                                                                             |
| Free Dox                                 | 41.7 ± 2.1                                                                            | 3.0 ± 2.1                                                       |                                                              |                                                                                             |
| Non-targeted Dox NPs                     | 35.9 ± 3.0                                                                            | N/A                                                             |                                                              |                                                                                             |
| SHAL-functionalized Dox<br>NPs           | 45.3 ± 1.8                                                                            | 6.5 ± 1.8                                                       |                                                              |                                                                                             |
| Free SHAL + free Dox                     | 38.6 ± 1.1                                                                            | N/A                                                             |                                                              |                                                                                             |
| SHAL NPs + non-targeted Dox NPs          | 39.5 ± 2.4                                                                            | 0.8 ± 2.4                                                       |                                                              |                                                                                             |
| PBS + XRT                                | 56.7 ± 1.3                                                                            | 18.0 ± 1.3                                                      |                                                              |                                                                                             |
| Free SHAL + XRT                          | 57.7 ± 4.0                                                                            | 19.0 ± 4.0                                                      | N/A                                                          | N/A                                                                                         |
| SHAL NPs + XRT                           | 64.1 ± 2.3                                                                            | 25.4 ± 2.3                                                      | 4.4 ± 2.3                                                    | N/A                                                                                         |
| Free Dox + XRT                           | 74.3 ± 0.8                                                                            | 35.6 ± 0.8                                                      | 14.5 ± 0.8                                                   | N/A                                                                                         |
| Non-targeted Dox NPs + XRT               | 50.5 ± 0.8                                                                            | 11.8 ± 0.8                                                      | N/A                                                          | N/A                                                                                         |
| SHAL-functionalized Dox<br>NPs + XRT     | > 80                                                                                  | > 41.3                                                          | > 20.3                                                       | > 1.13 (+ 13 %)                                                                             |
| Free SHAL + free Dox + XRT               | 72.2 ± 0.9                                                                            | 33.5 ± 0.9                                                      | 12.5 ± 0.9                                                   | N/A                                                                                         |
| SHAL NPs + non-targeted<br>Dox NPs + XRT | 71.4 ± 1.9                                                                            | 32.7 ± 1.9                                                      | 11.7 ± 1.9                                                   | N/A                                                                                         |

**Table S2.** Table summarizing the absolute growth delay, normalized growth delay and enhancement factor (E.F.) of Daudi-xenograft tumor bearing mice after receiving different chemo-immunotherapy and concurrent CIRT treatment. [<sup>a</sup> Absolute growth delay (A.G.D.) caused by Dox and/or SHAL (co)treatment with/without concurrent XRT is defined as the time in day(s) tumors required to reach 1,000 mm<sup>3</sup> post-inoculation minus the time in days untreated tumors required to grow to 1,000 mm<sup>3</sup>. <sup>b</sup> Normalized growth delay (N.G.D.) is defined as time in days for tumors to reach 1,000 mm<sup>3</sup> post-inoculation in mice treated by free/encapsulated Dox with/without free/conjugated SHAL plus radiation minus the time in days for tumors to reach 1,000 mm<sup>3</sup> post-inoculation in mice only received chemotherapy. <sup>c</sup> Enhancement factors (E.F.): obtained by dividing normalized tumor growth delay in mice treated with different chemotherapy plus radiation by the absolute growth delay in mice treat with radiation only. N/A denotes no enhancement (i.e., E.F. < 1).]

|                                       | Time in days required for tumor to grow to 1,000 cm <sup>3</sup> or death | Absolute growth delay (A.G.D.), day(s) <sup>a</sup> | Normalized growth delay (N.G.D.), days <sup>b</sup> | Enhancement factors (E.F.) (change in tumor sensitivity to XRT, %) <sup>c</sup> |
|---------------------------------------|---------------------------------------------------------------------------|-----------------------------------------------------|-----------------------------------------------------|---------------------------------------------------------------------------------|
| PBS (no treatment)                    | 34.3 ± 2.3                                                                |                                                     |                                                     |                                                                                 |
| Free SHAL                             | 36.9 ± 2.8                                                                | 2.5 ± 2.8                                           |                                                     |                                                                                 |
| SHAL NPs                              | 42.3 ± 2.5                                                                | 8.0 ± 2.5                                           |                                                     |                                                                                 |
| Free Dox                              | 42.3 ± 3.6                                                                | 8.0 ± 3.6                                           |                                                     |                                                                                 |
| Non-targeted Dox NPs                  | 39.3 ± 3.2                                                                | 5.0 ± 3.2                                           |                                                     |                                                                                 |
| SHAL-functionalized Dox NPs           | 51.3 ± 4.9                                                                | 17.0 ± 4.9                                          |                                                     |                                                                                 |
| Free SHAL + free Dox                  | 35.3 ± 5.4                                                                | 1.0 ± 5.4                                           |                                                     |                                                                                 |
| SHAL NPs + non-targeted Dox NPs       | 41.9 ± 3.6                                                                | 7.5 ± 3.6                                           |                                                     |                                                                                 |
| PBS + XRT                             | 47.5 ± 3.2                                                                | 13.2 ± 3.2                                          |                                                     |                                                                                 |
| Free SHAL + XRT                       | 41.8 ± 5.0                                                                | 7.5 ± 5.0                                           | -5.7 ± 5.0                                          | N/A                                                                             |
| SHAL NPs + XRT                        | 48.7 ± 2.9                                                                | 14.4 ± 2.9                                          | 1.2 ± 2.9                                           | N/A                                                                             |
| Free Dox + XRT                        | 46.5 ± 1.6                                                                | 17.0 ± 1.6                                          | 3.8 ± 1.6                                           | N/A                                                                             |
| Non-targeted Dox NPs + XRT            | 50.5 ± 2.1                                                                | 16.2 ± 2.1                                          | 3.0 ± 0.6                                           | N/A                                                                             |
| SHAL-functionalized Dox NPs + XRT     | > 80                                                                      | > 16.2                                              | > 32.5                                              | > 2.46 (+ 146 %)                                                                |
| Free SHAL + free Dox + XRT            | 41.6 ± 8.9                                                                | 13.7 ± 8.9                                          | 0.5 ± 8.9                                           | N/A                                                                             |
| SHAL NPs + non-targeted Dox NPs + XRT | 40.0 ± 3.0                                                                | 5.7 ± 3.0                                           | - 3.5 ± 3.0                                         | N/A                                                                             |

**Table S3.** Table summarize the absolute growth delay, normalized growth delay and enhancement factor (E.F.) of Raji-xenograft tumor bearing mice after receiving different chemo-immunotherapy and concurrent CIRT treatment. [<sup>a</sup> Absolute growth delay (A.G.D.) caused by Dox and/or SHAL (co)treatment with/without concurrent XRT is defined as the time in day(s) tumors required to reach 1,000 mm<sup>3</sup> post-inoculation minus the time in days untreated tumors required to grow to 1,000 mm<sup>3</sup>. <sup>b</sup> Normalized growth delay (N.G.D.) is defined as time in days for tumors to reach 1,000 mm<sup>3</sup> post-inoculation in mice treated by free/encapsulated Dox with/without free/conjugated SHAL plus radiation minus the time in days for tumors to reach 1,000 mm<sup>3</sup> post-inoculation in mice only received chemotherapy. <sup>c</sup> Enhancement factors (E.F.): obtained by dividing normalized tumor growth delay in mice treated with different chemotherapy plus radiation by the absolute growth delay in mice treat with radiation only. N/A denotes no enhancement (i.e., E.F. < 1).]
